# Supplementary material for: Protein kinase D3 modulates MMP1 and MMP13 expression in human chondrocytes
Source: PubMed Central journal article supplement (PMC5898748; doi:10.1371/journal.pone.0195864), 2018-04-13

**PKC $\zeta$** 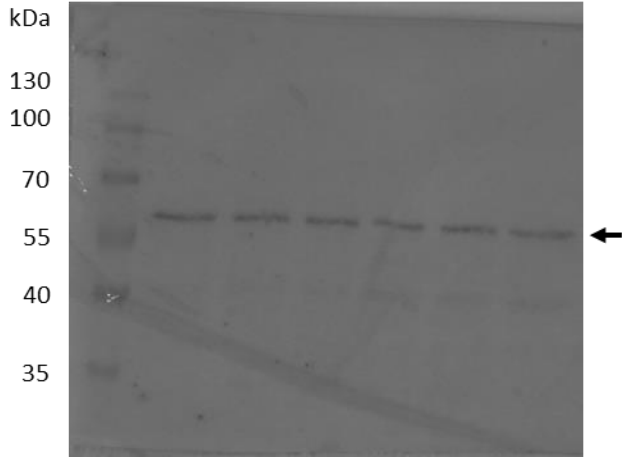**PKC $\iota$** 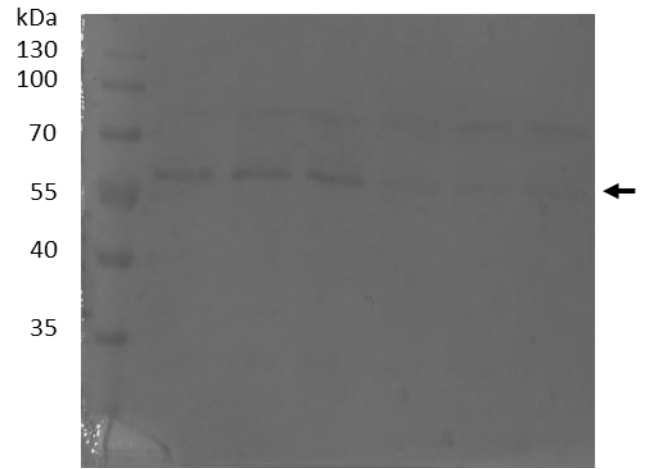**p-PKD Ser744/Ser748**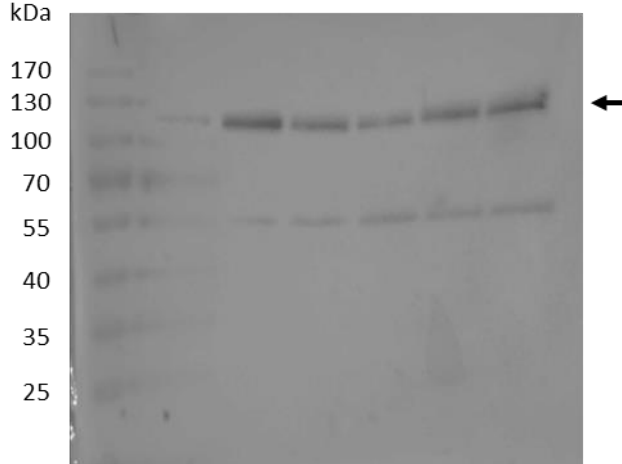**p-PKD Ser916**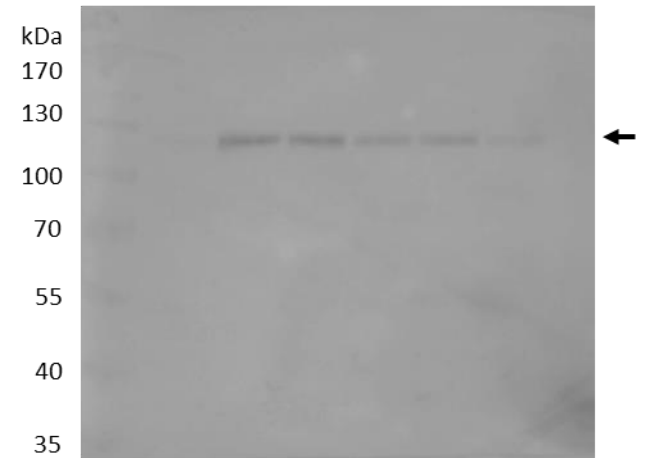**PKD1**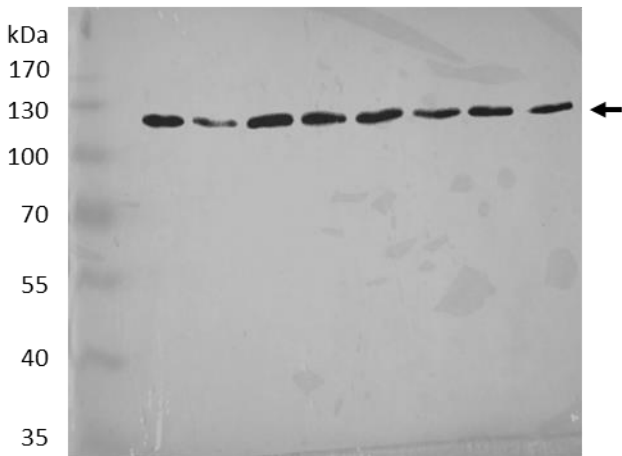**PKD2**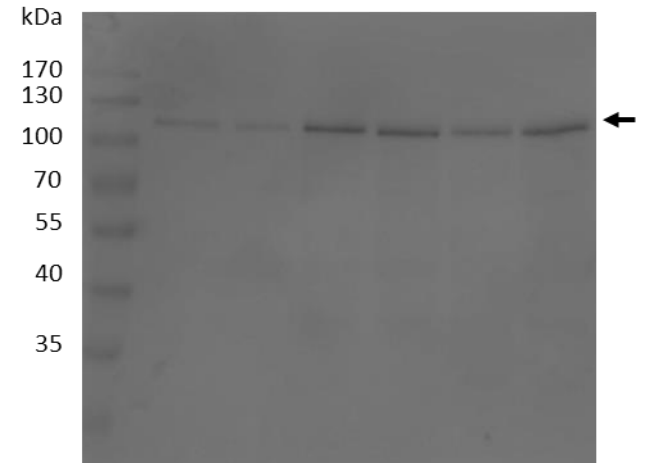

**PKD3**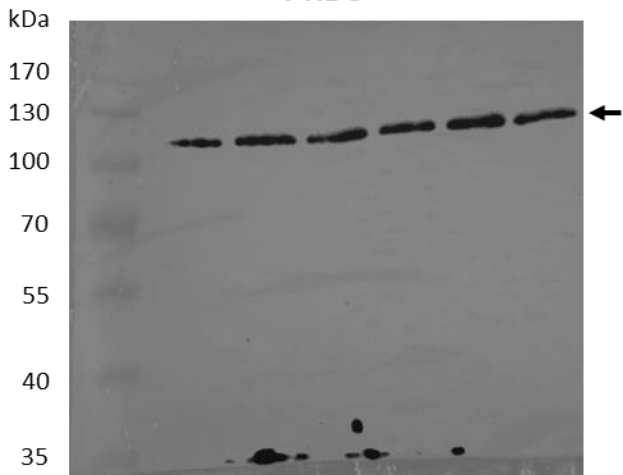**p-Akt Ser473**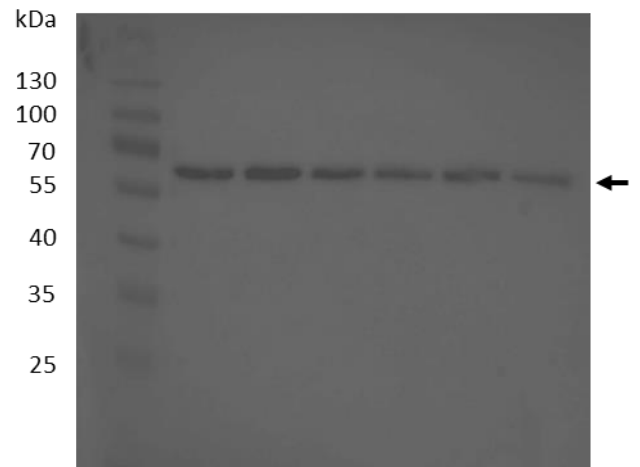**p-JNK Thr183/Tyr185**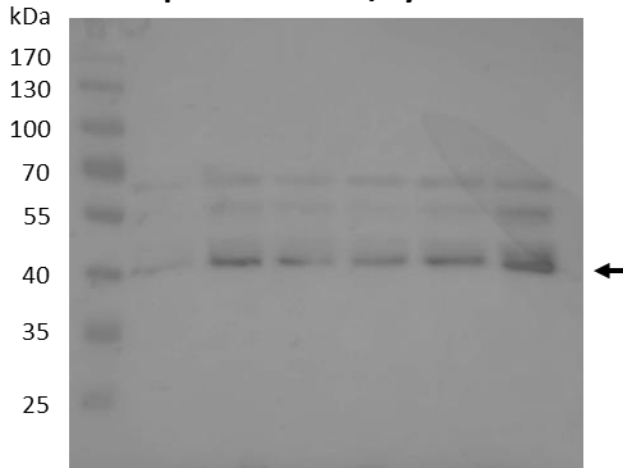**p-ERK Thr202/Tyr204**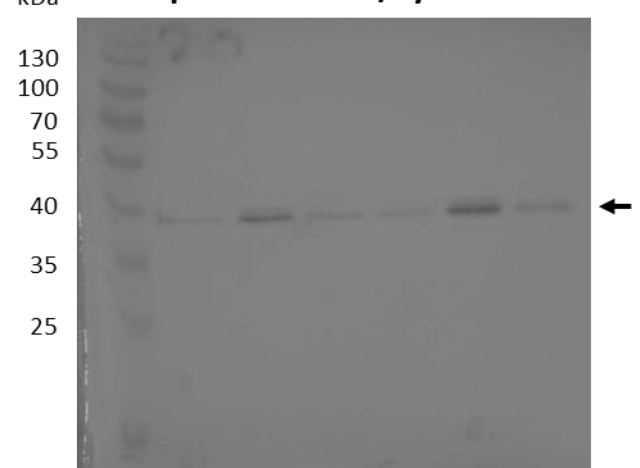**p-p38 Thr180/Tyr182**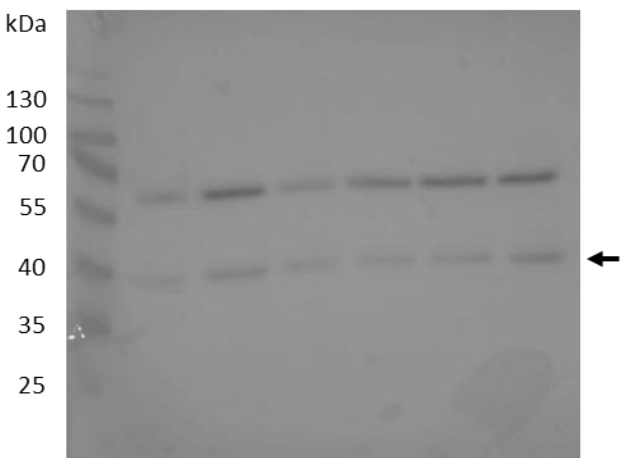**MEK2**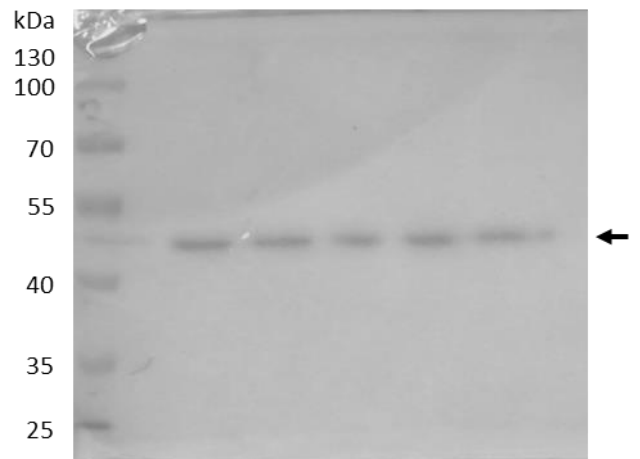

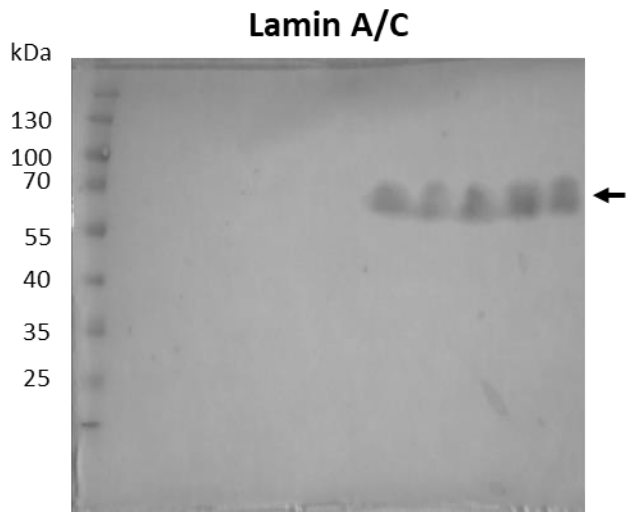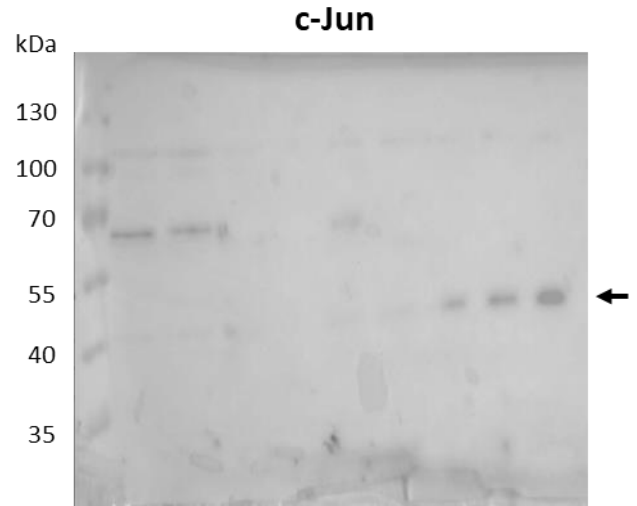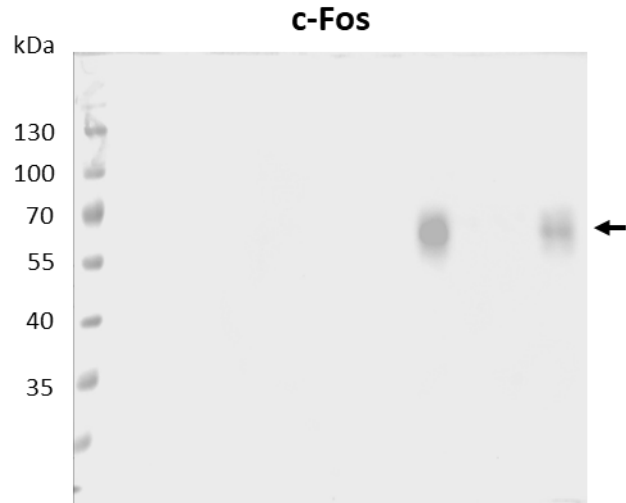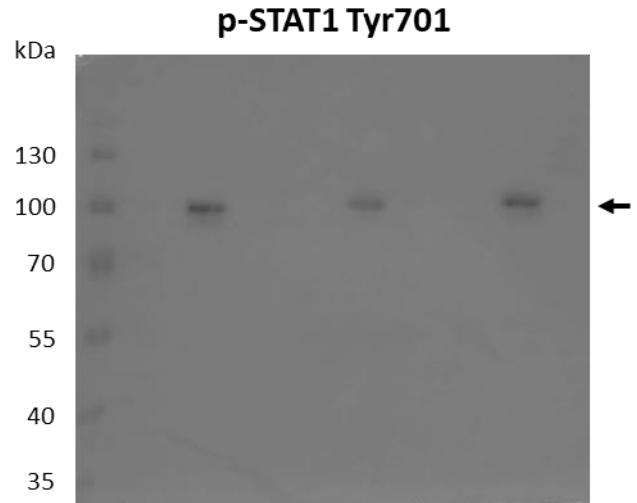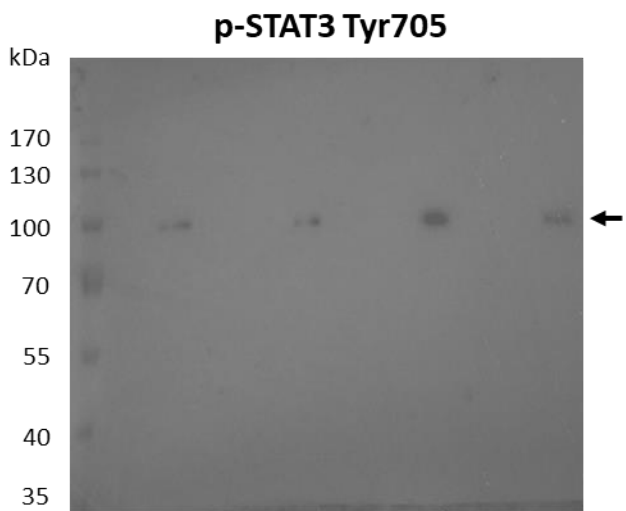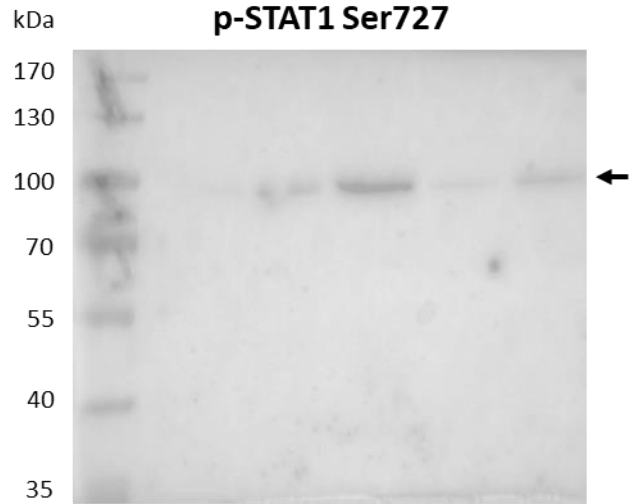

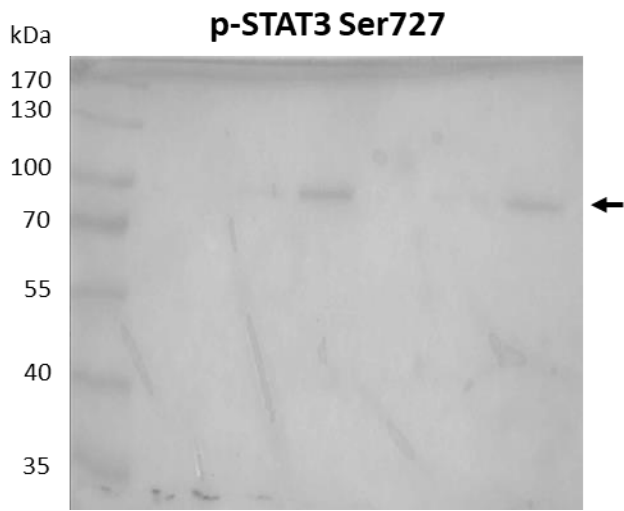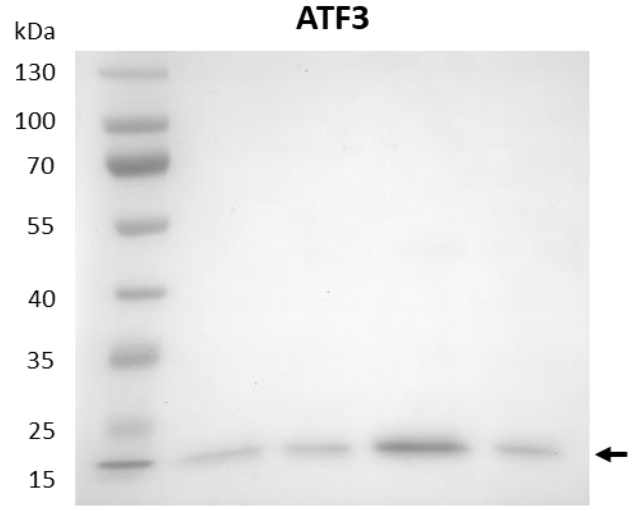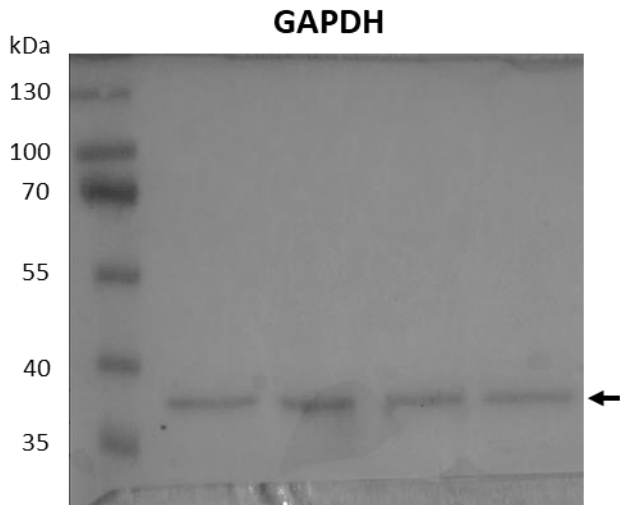

Supplement: pone.0195864.s001.pdf [file pone.0195864.s001.pdf]
