# Supplementary material for: Protein kinase D3 modulates MMP1 and MMP13 expression in human chondrocytes
Source: PubMed Central journal article supplement (PMC5898748; doi:10.1371/journal.pone.0195864), 2018-04-13

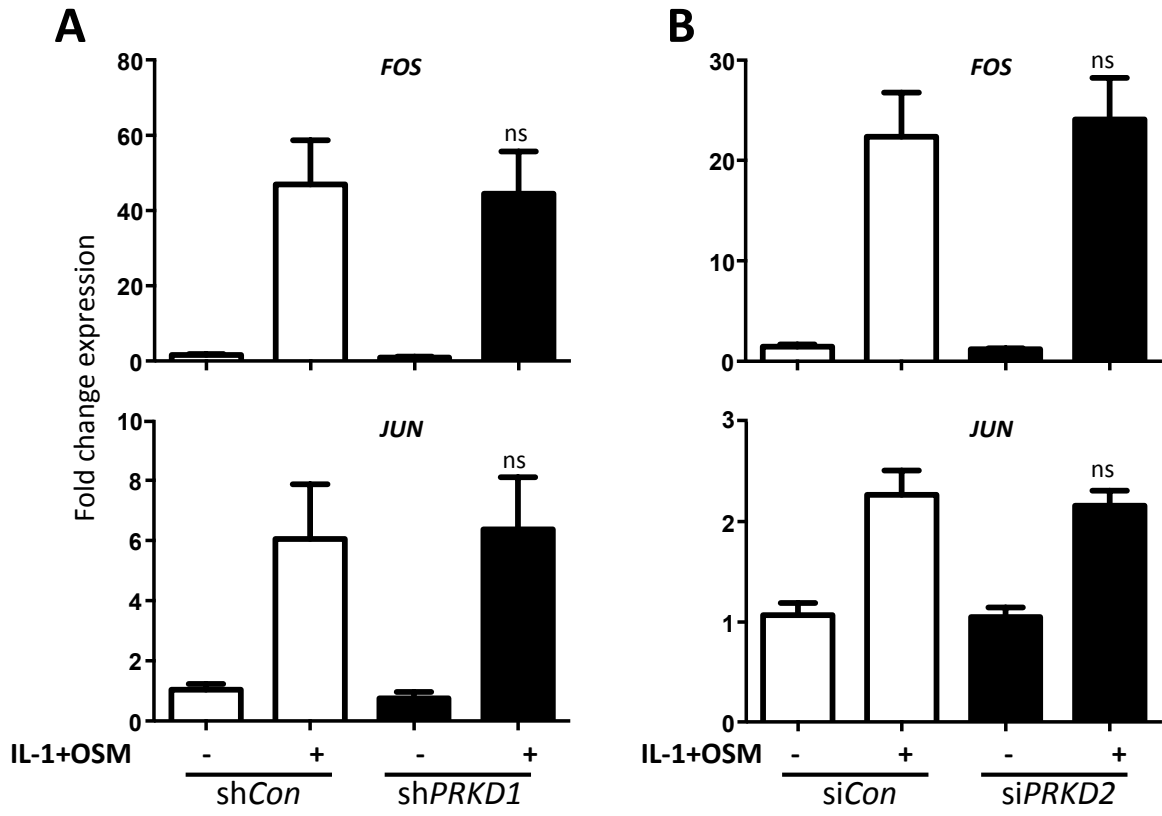

Supplement: pone.0195864.s006.pdf [file pone.0195864.s006.pdf]
